# Supplementary material for: Implementation evaluation and refinement of an intervention to improve blunt chest injury management—A mixed‐methods study
Source: PubMed Central journal article supplement — J Clin Nurs. 2017 Apr 18;26(23-24):4506–18. doi: 10.1111/jocn.13782 (PMC6686633; doi:10.1111/jocn.13782), 2017-04-18
Supplement: JOCN-26-4506-s001.pdf [file JOCN-26-4506-s001.pdf]

# Chest Injury Protocol (ChIP) Evaluation Survey

Thank you for choosing to participate in this survey on the evaluation of the St George Hospital Chest Injury Protocol (ChIP). We would like your opinion on the clarity and ease of use of ChIP and whether you believe the protocol has made a difference in clinical care.

This survey is part of the evaluation into the Chest Injury Protocol being conducted by the St George Hospital Trauma and Emergency Departments. The survey should take 10 minutes to complete.

1 What is your clinical department (please select appropriate box)?

- Trauma service
- Pain team
- Anaesthetics
- ICU
- Physiotherapy
- General Surgery
- Emergency
- Switchboard
- Other

Please provide your clinical department

---

2 What is your clinical role?

- Staff Specialist
- Fellow
- Registrar
- RMO
- JMO
- CMO
- VMO
- CNC
- Nurse
- CNS
- NUM
- Other

Please describe your role

---

3 How long have you been in that role?

- < 1 year
- 1-5 years
- >5 years

---



---

**Definition of the Chest Injury Protocol (ChIP)**

4 Do you know what the Chest Injury Protocol (ChIP) is?

- Yes  
 No

5 How would you define the Chest Injury Protocol (ChIP)?

- A specialty team notification and activation page for the trauma team, physiotherapy and pain team  
 A clinical practice guideline that determines a treatment pathway  
 Specialty team notification and activation page - cardiothoracic, intensive care and aged care  
 I don't know  
 Other

Please comment on what you do know about ChIP

\_\_\_\_\_

Please comment on how would you define the Chest Injury Protocol (ChIP)

\_\_\_\_\_

6 How did you find out about ChIP? (select all that apply)

- Orientation to my department  
 Staff meeting  
 Inservice  
 Word of mouth from colleagues  
 Manager (e.g. NUM or staff specialist)  
 Trauma service staff  
 Staff email/ newsletter  
 Sign up in my department  
 Don't remember  
 Other

Please comment on how you found out about ChIP

\_\_\_\_\_

7 What is your role in ChIP?

- Activator (includes suggesting that ChIP should be activated)  
 Responder (I receive a ChIP page and am expected to review the patient)  
 Both activator and responder  
 I don't activate or respond, but I look after people with blunt chest injury  
 Other

Please comment on what is your role in ChIP

\_\_\_\_\_

8 Do you think that your role in ChIP is important?

- Yes  
 No  
 Don't know

Please comment on your response

\_\_\_\_\_

---



---

**ChIP activation process**

|                                                                                            | N/A                      | Never                    | Rarely                   | Sometimes                | Most of the time         | All the time             |
|--------------------------------------------------------------------------------------------|--------------------------|--------------------------|--------------------------|--------------------------|--------------------------|--------------------------|
| 9 Do you know when to activate the ChIP page?                                              | <input type="checkbox"/> |
| 10 Do you know how to activate the ChIP page?                                              | <input type="checkbox"/> |
| 11 Do you feel confident in activating the ChIP page or suggesting it should be activated? | <input type="checkbox"/> |
| 12 Do people you work with remind or suggest you activate the ChIP page?                   | <input type="checkbox"/> |
| 13 Do you remind or suggest to others to activate the ChIP page?                           | <input type="checkbox"/> |
| 14 Are there times when you are likely to forget to activate the ChIP page?                | <input type="checkbox"/> |
| 15 I am always certain when to activate ChIP                                               | <input type="checkbox"/> |

Please comment on your responses \_\_\_\_\_

**Activation Criteria**

16 In which blunt chest injured patients do you think CHIP should be activated in: (select all that apply)

- Patients aged greater than 55 years
- Patients aged less than 55 years
- Patients with 3 or more rib fractures
- Patients with less than 3 rib fractures
- Patients with blunt chest injury but no rib fractures on xray
- Patients with underlying lung disease
- Patients with blunt chest injury that don't meet trauma team activation
- Patients with blunt chest injury requiring opioid analgesia
- I don't know
- Other

Please comment on which blunt chest injured patients you think CHIP should be activated in

\_\_\_\_\_

|                                                                               |                          |                          |                          |                          |                          |
|-------------------------------------------------------------------------------|--------------------------|--------------------------|--------------------------|--------------------------|--------------------------|
|                                                                               | Never                    | Rarely                   | Sometimes                | Most of the time         | All the time             |
| 17 Once CHIP has been activated, I am guided as to what clinical care to give | <input type="checkbox"/> |

Please comment on your response

\_\_\_\_\_

18 Please explain what components of the CHIP protocol you think need to be made clearer? (select all that apply)

- None
- Definition of a blunt trauma mechanism
- Activation criteria
- Who needs to respond
- Time frame required for a team to respond
- How to respond once a CHIP page has been activated
- What treatment I should commence once activated
- Other

Please state what components of CHIP need to be made clearer

\_\_\_\_\_

Please comment on your response for what components of the CHIP protocol you think need to be made clearer?

\_\_\_\_\_

---



---

**Need and use of ChIP**

Please select how much you agree with the following statements

|                                                                       | Disagree                 | Somewhat<br>disagree     | Not sure                 | Agree                    | Strongly agree           |
|-----------------------------------------------------------------------|--------------------------|--------------------------|--------------------------|--------------------------|--------------------------|
| 19 The ChIP protocol is too specific (not enough clinical discretion) | <input type="checkbox"/> |
| 20 The ChIP protocol is too complicated                               | <input type="checkbox"/> |
| 21 When ChIP is activated, the required responders attend promptly    | <input type="checkbox"/> |

Please comment on your response

---

22 What are some reasons that stop you from using ChIP?

---

23 What are some reasons that help or encourage you to use ChIP?

---

24 Do you think there is a need for an expedited (quick and early) response from the trauma or surgical team (less than 60 minutes) for patients with blunt chest injury?

- Yes  
 No  
 Don't know

Please comment on your response

---

25 Do you think there is a need for early intervention from a physiotherapist for patients with blunt chest injury?

- Yes  
 No  
 Don't know

Please comment on your response

---

26 Do you think there is a need for a expedited (quick and early) response from the pain team for patients with blunt chest injury?

- Yes  
 No  
 Don't know

Please comment on your response

---

---

---

### Impact of CHIP

27 Do you think that the CHIP protocol achieves an expedited response?

- Yes
- No
- Don't know

Please comment on your response

---

28 Do you think that CHIP has led to improved patient outcomes?

- Yes
- Sometimes
- No
- Don't know

Please comment on your response

---

---

---

**Improvements with CHIP****Do you think CHIP has improved any of the following**

|                                                        | Never                    | Rarely                   | Sometimes                | Most of the time         | All the time             |
|--------------------------------------------------------|--------------------------|--------------------------|--------------------------|--------------------------|--------------------------|
| 29 Early analgesia                                     | <input type="checkbox"/> |
| 30 Time to physiotherapy review                        | <input type="checkbox"/> |
| 31 Time to admitting team review                       | <input type="checkbox"/> |
| 32 Time to decision to admit                           | <input type="checkbox"/> |
| 33 Reducing length of time in the emergency department | <input type="checkbox"/> |
| 34 Time to pain team review                            | <input type="checkbox"/> |
| 35 Overall patient care                                | <input type="checkbox"/> |
| 36 Overall admission process                           | <input type="checkbox"/> |

Please comment on your responses

---

---



---

**Responding to ChIP**

The following questions are specific for those that respond to ChIP activations

|                                                                                     | N/A                      | Never                    | Rarely                   | Sometimes                | Frequently               | All the time             |
|-------------------------------------------------------------------------------------|--------------------------|--------------------------|--------------------------|--------------------------|--------------------------|--------------------------|
| 37 Do you experience false activations i.e. patients that do not meet ChIP criteria | <input type="checkbox"/> |
| 38 Do you ever feel that the surgical review is not necessary on ChIP patients      | <input type="checkbox"/> |
| 39 Do you ever feel that early physiotherapy review is not needed on ChIP patients  | <input type="checkbox"/> |
| 40 Do you ever feel that early pain team review is not needed on ChIP patients      | <input type="checkbox"/> |
| 41 Are you able to respond to a ChIP page within the 60 minutes required            | <input type="checkbox"/> |

Please comment on your responses \_\_\_\_\_



---

---

**Suggestions and final comments**

42 Do you have any suggestions for changes to ChIP?  
(select all that apply)

- None
- There should be an age limitation
- It should be expanded to include a treatment pathway post ChIP activation
- Aged care should also respond
- Cardiothoracic should respond
- Increased awareness by ED medical staff about ChIP is needed
- Increased awareness by ED nursing staff is needed
- Increased awareness by surgical registrars is needed
- Increased awareness by pain registrar is needed
- Increased awareness by pain CNC is needed
- Increased awareness by physiotherapy is needed
- Other

Please comment on your suggestions for changes to ChIP

---

43 Are there any final comments you would like to make about ChIP?

---

44 Would you be willing to be contacted for an interview to discuss your comments and any changes you think should be made to ChIP

- Yes
- No

Please provide your name and contact number

---

Please provide your email address

---
